# Supplementary material for: Serotonin Signaling Through the 5-HT1B Receptor and NADPH Oxidase 1 in Pulmonary Arterial Hypertension
Source: PubMed Central journal article supplement (PMC5478178; doi:10.1161/atvbaha.116.308929), 2017-06-21

**Pulmonary artery smooth muscle cells**

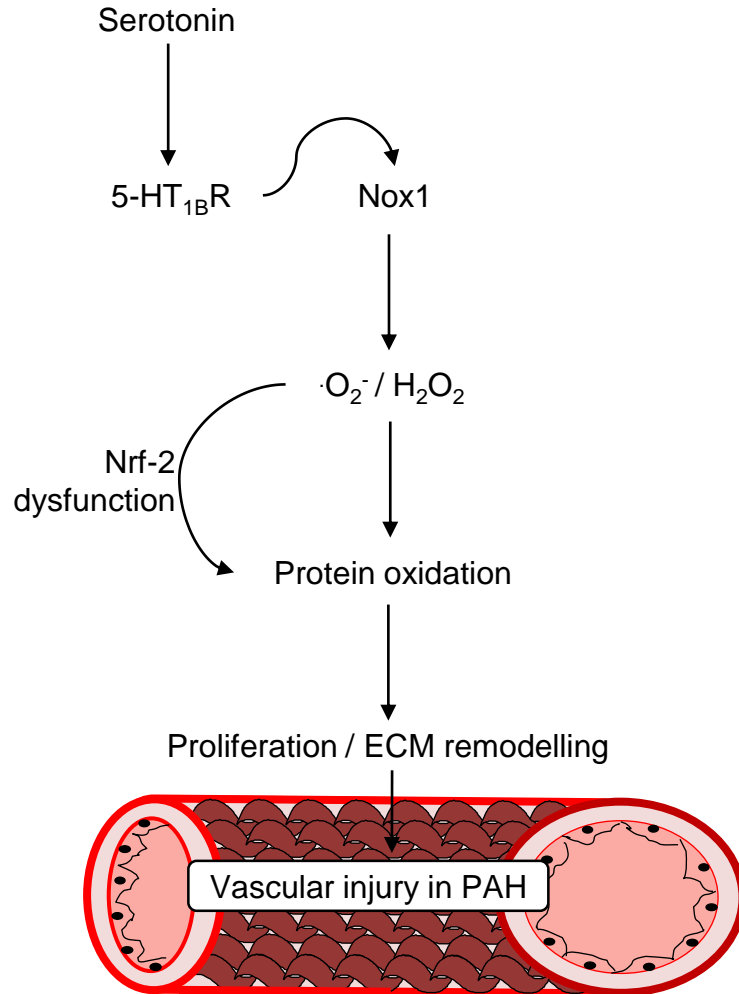

Supplement: atv-37-1361-s001.pdf [file atv-37-1361-s001.pdf]
